# Supplementary material
Source: publisher figshare collection journal article supplement (https://acs.figshare.com/ndownloader/files/7506211)
Supplement: Supplementary file 1 [file 7506211]

## Supporting information

### Conformation and Dynamics of Individual Star in Shear Flow and Comparison with Linear and Ring Polymers

Wenduo Chen<sup>1</sup>, Kexin Zhang<sup>2</sup>, Lijun Liu<sup>3</sup>, Jizhong Chen<sup>3</sup>, Yunqi Li<sup>1\*</sup>, Lijia An<sup>3</sup>

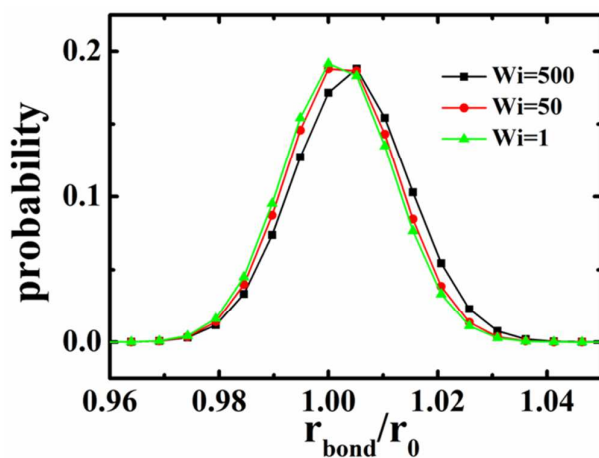

Figure S1. Probability distribution of bond lengths at different shear strains with  $Wi = 500, 50, 1$  for star polymers with  $f=3$  and  $L_f=20$ .

In order to gain a deep understanding of the deformation of star polymers under shear flow, the three eigenvalues of the gyration tensor are calculated in our simulations. As shown in Figure S2., for  $Wi < 1$ , the polymer chains with different architectures have no obvious deformation. With the increase of Weissenberg number, the polymer chains are stretched in the flow direction, accompanied with shrinking in the shear-gradient and vorticity directions. The deformation of polymer chains can be characterized by the ratio of  $G_1/G_3$ . Linear polymers have the largest deformation and highly stretched along the shear flow direction, ring polymers have similar deformation with the star polymer of arms of 3. Star polymers with more arms behave more like spherical colloid, so the deformation decreases. The deformation of the polymer chains with different architectures follows the scaling relationship  $G_1/G_3 \sim Wi^\alpha$  with the exponents of 0.45, 0.47, 0.54 for linear, ring and star ( $f=10$  and  $L_f=10$ ) polymers, respectively.

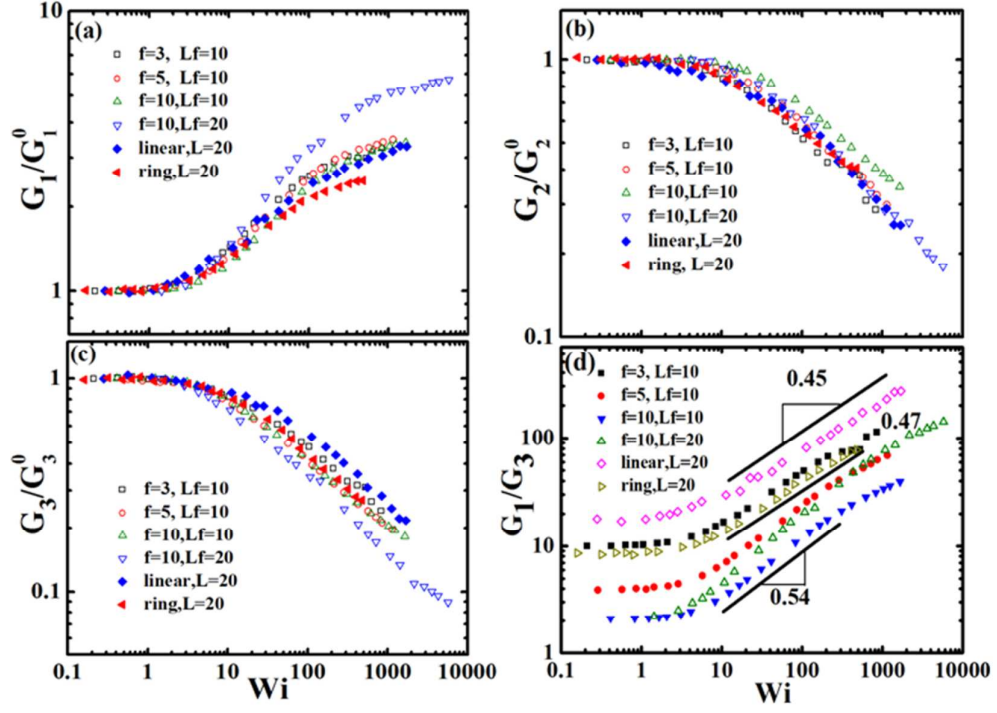

Figure S2. The averaged largest (a)  $G_1$ , the intermediate (b)  $G_2$ , and the smallest (c)  $G_3$  eigenvalues and (d) the ratio  $G_1/G_3$  as a function of the Weissenberg number  $Wi$  for linear, ring and star polymers.  $G_1^0$ ,  $G_2^0$  and  $G_3^0$  are the eigenvalues in zero-shear state. The solid lines indicate the scaling relationship  $G_1/G_3 \sim Wi^\mu$  with the exponents of 0.45, 0.47, 0.54 for linear, ring and star ( $f=10$  and  $Lf=20$ ) polymers, respectively.

### Description of Animations

The animations of the dynamics of a star polymer with  $L_f=10$  and  $f=3$  (starf3lf10.mpg), 5 (starf5lf10.mpg) and 10 (starf10lf10.mpg), respectively, in shear flow at the reduced Weissenberg number  $Wi/f=20$ .
